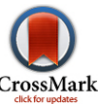

# Fixational Eye Movement Correction of Blink-Induced Gaze Position Errors

Francisco M. Costela<sup>1,2</sup>, Jorge Otero-Millan<sup>1,3</sup>, Michael B. McCamy<sup>1</sup>, Stephen L. Macknik<sup>1,4</sup>,  
Xoana G. Troncoso<sup>1,5</sup>, Ali Najafian Jazi<sup>1</sup>, Sharon M. Crook<sup>6</sup>, Susana Martinez-Conde<sup>1,4\*</sup>

**1** Barrow Neurological Institute, Phoenix, Arizona, United States of America, **2** Interdisciplinary Graduate program in Neuroscience, Arizona State University, Phoenix, Arizona, United States of America, **3** Department of Neurology, Johns Hopkins University, Baltimore, Maryland, United States of America, **4** Department of Ophthalmology, State University of New York Downstate Medical Center, Brooklyn, New York, United States of America, **5** Unité de Neurosciences, Information et Complexité (CNRS-UNIC), UPR CNRS 3293, Gif-sur-Yvette, France, **6** School of Mathematical and Statistical Sciences and School of Life Sciences, Arizona State University, Phoenix, Arizona, United States of America

## Abstract

Our eyes move continuously. Even when we attempt to fix our gaze, we produce “fixational” eye movements including microsaccades, drift and tremor. The potential role of microsaccades versus drifts in the control of eye position has been debated for decades and remains in question today. Here we set out to determine the corrective functions of microsaccades and drifts on gaze-position errors due to blinks in non-human primates (*Macaca mulatta*) and humans. Our results show that blinks contribute to the instability of gaze during fixation, and that microsaccades, but not drifts, correct fixation errors introduced by blinks. These findings provide new insights about eye position control during fixation, and indicate a more general role of microsaccades in fixation correction than thought previously.

**Citation:** Costela FM, Otero-Millan J, McCamy MB, Macknik SL, Troncoso XG, et al. (2014) Fixational Eye Movement Correction of Blink-Induced Gaze Position Errors. PLoS ONE 9(10): e110889. doi:10.1371/journal.pone.0110889

**Editor:** Kevin Paterson, University of Leicester, United Kingdom

**Received:** June 20, 2014; **Accepted:** September 24, 2014; **Published:** October 21, 2014

**Copyright:** © 2014 Costela et al. This is an open-access article distributed under the terms of the Creative Commons Attribution License, which permits unrestricted use, distribution, and reproduction in any medium, provided the original author and source are credited.

**Data Availability:** The authors confirm that all data underlying the findings are fully available without restriction. All relevant data are within the paper and its Supporting Information files.

**Funding:** Barrow Neurological Foundation (<http://www.thebarrow.org/>) to SLM and SMC. National Science Foundations Awards 0852636 and 1153786 to SMC and Award 0726113 to SLM. The funders had no role in study design, data collection and analysis, decision to publish, or preparation of the manuscript.

**Competing Interests:** Co-author SM is a PLOS ONE Editorial Board member. This does not alter the authors' adherence to PLOS ONE Editorial policies and criteria.

\* Email: smart@neuralcorrelate.com

## Introduction

The role of microsaccades in the control and correction of fixation position has been controversial for over 50 years [1–4]. Cornsweet originally proposed that microsaccades serve to refoveate the target after intersaccadic drifts [5], but was subsequently challenged. By the end of the 1970 s, most of the field agreed that microsaccades were not necessary for the control of fixation position, whereas drift (also called slow control) served that purpose (see [4] for a historical review). This conclusion remained uncontested until the early 2000 s, when new analyses indicated that microsaccades introduce fixation errors on a short timescale, and correct fixation errors on a longer timescale [6].

Research into the mechanisms of microsaccade generation has helped to clarify the role of microsaccades in fixation correction. Current findings support a combined role of neural noise and fixation error in triggering microsaccades during attempted fixation, with the contribution of each signal depending on the magnitude of the gaze position error [7]. For example, if a subject's gaze deviates from the target by  $\sim 0.5^\circ$  or more, corrective microsaccades might rectify the error [5,8], whereas if the fixation error is small or insignificant, neural noise might trigger subsequent microsaccades instead [7].

Otero-Millan et al previously showed a corrective role for microsaccades in the form of square-wave jerk pairing [8,9], but it is not known whether microsaccades play a more general role in

error correction during fixation. Indeed, the role of microsaccades in improving fixation stability remains in question [10], as do the comparative roles of drift and microsaccades in oculomotor control [4].

Here we set out to a) characterize the fixation errors due to gaze position changes caused by spontaneous blinks, and b) probe the comparative significance of microsaccades and drift for the correction of blink-induced gaze errors. Our results indicate that blinks contribute to gaze instability during fixation (i.e. eye motion during blinks results in sizable fixation errors at the end of the blinks) and that microsaccades correct blink-induced fixation errors better than drifts.

## Methods

### 1.1 Subjects

**Non-human primates.** Eye position was recorded monocularly at 1000 Hz with a scleral search coil [11–13]. Recordings included data from five awake adult rhesus macaques (*Macaca mulatta*). Three monkeys were studied at Harvard Medical School (eye-tracking equipment by Rempel Labs, Inc) and two monkeys were studied at the Barrow Neurological Institute (eye-tracking equipment by Riverbend Instruments, Inc). Standard sterile surgical techniques, recording procedures and animal care methods were approved by the Harvard Medical School Standing

Committee on Animals and the Institutional Animal Care and Use Committee at the Barrow Neurological Institute. Monkeys sat in a custom primate chair with their heads restrained, and fixated their gaze on a small fixation target on a video monitor (Reference Calibrator V, 60–120 Hz refresh rate; Barco) placed at a distance of 57 cm. Fruit juice rewards were provided for every ~1.5–2 seconds of fixation. Eye movements exceeding a 2×2 deg fixation window were recorded but not rewarded. Three monkeys were tested during previously reported studies that addressed different experimental questions [12,13].

The animals were bred in captivity and housed individually in non-human primate cages (group 4; dimensions 89 cm width, 147 cm height, 125 cm depth, including perch) for the duration of the experiment. Monkeys were provided with several kinds of environmental enrichment, including a television, various fruits and vegetables, food puzzles, perches, Kong toys, mirrors, and other enrichment tools as available, along with visual and auditory contact with several other monkeys that were also housed individually in the same room, and positive daily human contact. The room had a 12 hour light/dark cycle. Regular veterinary care and monitoring, balanced nutrition, and sensory and social environmental enrichment were provided in accordance to the National Institutes of Health Guide for the Care and Use of Laboratory Animals, to maximize physical and psychological well-being. Monkeys had abundant access to food (i.e. feed biscuits were provided twice a day (approximately 12 biscuits/monkey), Purina Lab Diet Monkey Diet, Product# 0001333). Daily fluid intake was controlled and monitored during the experiments. Monkeys typically earned over 80% of their daily fluid allotment during the testing sessions, and received water and/or fruit supplements after the experiments. Whenever the animals were not actively participating in testing or training sessions (i.e. weekends, analysis and manuscript writing periods, etc), they had free access to water in the vivarium.

Cranial head-post and scleral search-coil implantation surgeries were conducted previous to the eye movement recordings, under general anesthesia using aseptic techniques, and with full post-operative analgesia and antibiotic therapy. No animals were sacrificed at the end of the experiments.

**Humans.** We recorded the eye movements of sixteen naive adult subjects (12 males, 5 females) with normal or corrected-to-normal vision, over 4 experimental sessions of ~30 min each, as part of a previously reported study [14]. Experiments were carried out under the guidelines and ethical approval of the Barrow Neurological Institute's Institutional Review Board (protocol number 04BN039). Written informed consent was obtained from each subject, and each subject received \$15/session. Subjects rested their forehead and chin on the EyeLink 1000 (SR Research) head/chin support 57 cm away from a linearized video monitor (Barco Reference Calibrator V, 75 Hz refresh rate). Subjects were instructed to look at a central circular target, or at the center of a 50% gray screen (see [14] for details). Trials were 30 s long, and subjects took short (~2–5 min) breaks after each eleventh trial. Each subjects' eye position was calibrated at the beginning of the experimental session, and re-calibrated after each break. We used custom code and the Psychophysics Toolbox [15–17] to display visual stimuli. Six subjects were discarded because they made fewer than 100 blinks. The present analyses do not overlap with analyses previously reported.

## 1.2 Blink detection

**Non-human primates.** We identified eye movements during blinks as epochs with sustained motion faster than typical drifts. Specifically, we classified an eye movement sample as part of a

blink if 70% of the samples in the 200 msec around it had velocities above a threshold of 3 deg/s plus twice the median velocity of the recording. We added an extra 50 msec before and after each blink to account for the slow start and end of some blinks. To calculate the eye velocity associated with blinks, we low-pass filtered the eye position (50 Hz Butterworth filter of order 20), and then calculated the polar velocity and filtered it with a 21 msec boxcar filter. We defined the magnitude of an eye movement during a blink as the maximum excursion of gaze direction from the initial gaze position at the start of the blink to the final gaze position at the end of the blink (microsaccade and drift magnitudes were calculated similarly). We analyzed eye movements of all magnitudes during blinks. Blinks and microsaccades followed different magnitude/peak velocity relationships (i.e. microsaccades had higher peak velocities than blinks), suggesting that our detection algorithm distinguished blinks from microsaccades successfully (**Figure 1**). The blink magnitude/peak velocity relationship found here is moreover in agreement with that previously reported by [18].

**Humans.** We identified blink periods as the portions of the EyeLink 1000 recorded data where the pupil information was missing. We added 100 ms before and after each period to further include the initial and final parts of the blink, where the pupil is partially occluded. We moreover removed those portions of the data corresponding to very fast decreases and increases in pupil area (>50 units per sample) plus the 100 ms before and after. Such periods are probably due to partial blinks, where the pupil is never fully occluded (thus failing to be identified as a blink by the EyeLink 1000 software) [19].

## 1.3 Saccade detection

We identified saccades with a modified version of the algorithm developed by Engbert & Kliegl [20–24] with  $\lambda = 8$  (used to obtain the velocity threshold) and a minimum saccadic duration of 8 msec, in both humans and non-human primates. Additionally, we imposed a minimum intersaccadic interval of 20 msec so that potential overshoot corrections might not be categorized as new saccades. We defined microsaccades as saccades with magnitude  $<2^\circ$  [14,25–27].

## 1.4 Drift detection

We only conducted drift analyses for the search coil-recorded non-human primate data. We defined drifts as the data between (micro)saccades, overshoots, and blinks, occurring in periods of at least 100 msec. To calculate the properties of each drift period, we low-pass filtered the eye position (60 Hz, Butterworth filter of order 13) and removed 10 msec at the beginning and the end to reduce edge effects due to the filter. We defined drift direction and magnitude as the direction and magnitude of the vector between the start and end of each drift.

## 1.5 Fixation error and correction ratio

We defined fixation error as the distance between the current eye position and the position of the fixation target. To quantify how well microsaccades and drift corrected fixation errors due to blinks, we defined the correction ratio (CR) as follows. For each blink and subsequent microsaccade/drift pair (that is, for the first microsaccade and drift that occurred immediately after the end of each blink), we calculated two quantities: BE, the blink error, which is the distance between the fixation point and the eye position at the end of the blink (the distance between point 1 and point 2 in **Figure 2B**, and the distance between point 2 and the black cross in **Figure 2C**), and D, the distance between the fixation point and the eye position at the end of the first

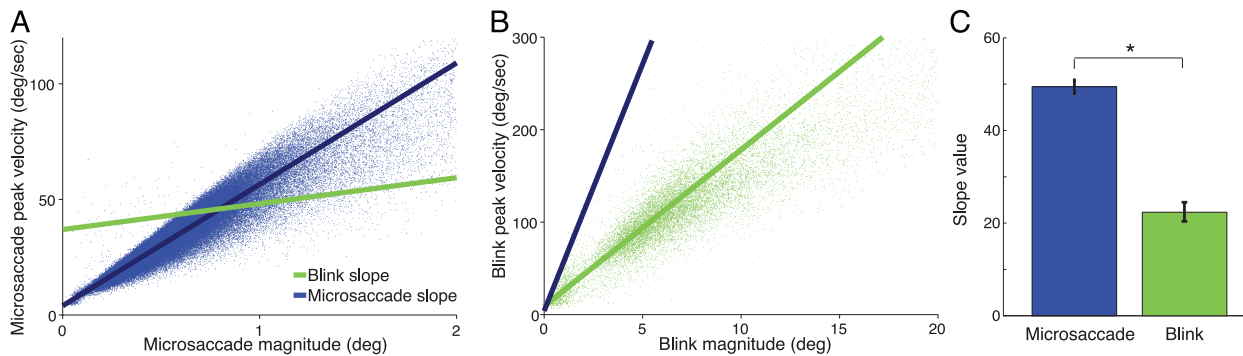

**Figure 1. Microsaccadic magnitude/peak velocity relationships (A) and blink magnitude/peak velocity relationship (B) for one experimental subject (monkey Y).** Each dot represents one microsaccade or blink. The lines are the linear fits to the data. Microsaccadic peak velocity was greater than blink peak velocity. (C) Average slope for microsaccades and blinks. Error bars indicate the SEM across subjects. Asterisk indicates statistical significance (two-tailed paired *t*-test,  $p < 0.05$ ) ( $n = 5$  monkeys). doi:10.1371/journal.pone.0110889.g001

microsaccade/drift following the blink (the distance between point 4 and the black cross for microsaccades, and the distance between point 3 and the black cross for drifts, in **Figure 2C**). We defined the correction ratio as:  $CR = \frac{BE-D}{BE+D}$ . CR is always between  $-1$  and  $1$ , with positive values indicating corrective eye movements (microsaccades/drifts that decrease blink error), and negative values corresponding to non-corrective eye movements (microsaccades/drifts that increase blink error). If the microsaccade/drift brings the eye position to the exact original position then  $D = 0$  and  $CR = 1$ .

### 1.6 Permutation analysis

To test the significance of the CR values, we used a permutation analysis to calculate the correction ratio expected by chance. For each blink-induced error we measured CR by replacing the post-blink microsaccade with a randomly selected microsaccade (from all the post-blink microsaccades). That is, we replaced the microsaccade (from point 3 to point 4 in **Figure 2A**) with the new random microsaccade (effectively changing the position of

point 4 in **Figure 2A**). Likewise, we replaced each post-blink drift with another random drift. We repeated the permutation method 1000 times and averaged the resulting CR values.

### Results

Awake rhesus macaques fixated a small target while we recorded their eye movements with the scleral search coil technique [11]. During the fixation task, eye movements consisted primarily of microsaccades and drifts, in addition to occasional larger saccades and spontaneous blinks. Spontaneous blinks resulted in fixation errors of moderate size ( $0.88 \pm 0.45$  deg on average), where the eye position at the end of a blink did not match the position of the fixation target (**Figure 2; Table 1**). Fixation errors after blinks were generally larger than fixation errors previous to blinks ( $0.33 \pm 0.17$  deg on average). (See **Table 2** for the average magnitude of fixation errors associated with different types of ocular events).

We set out to determine whether fixational eye movements (i.e. microsaccades and/or drift) produced after blinks might correct or

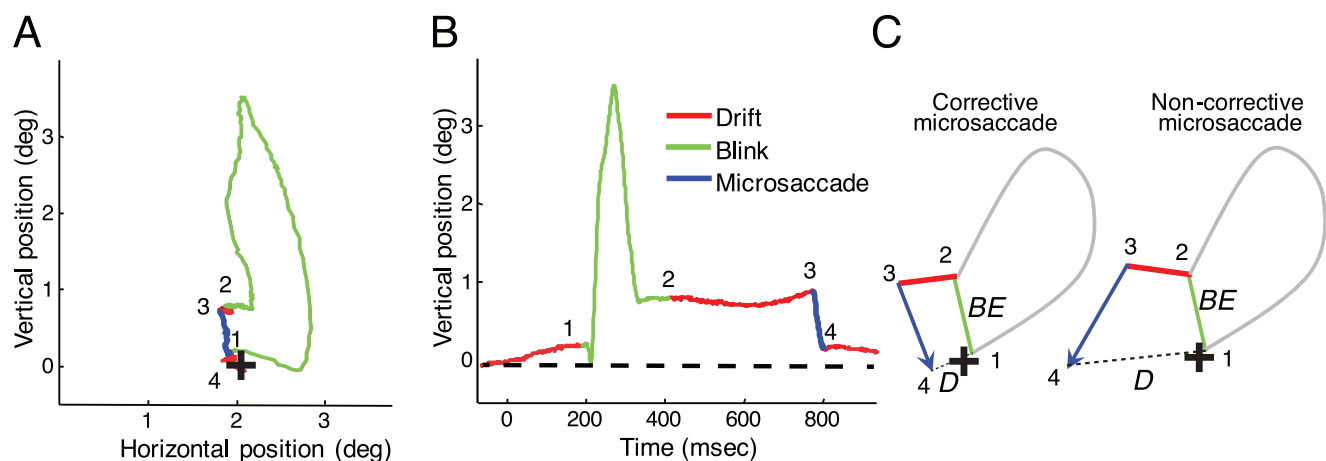

**Figure 2. Blink-induced fixation errors.** (A) Eye position trace showing an example of a blink (green) followed by drift (red) and then a microsaccade (blue). The black cross represents the fixation target. The eye position at the end of the blink (2) does not match the fixation target (black cross). A microsaccade corrects the error by bringing the eye from position (3) to (4), closer to the fixation target. (B) Vertical eye position for the same trace. The dashed line represents the fixation target. (C) Cartoons of corrective and non-corrective microsaccades. BE (dashed line) indicates the blink-induced fixation error and D (dotted line) the distance between the eye position at the end of the microsaccade and the fixation target. Left: the microsaccade reduces the blink-induced eye position error (D is shorter than BE). Right: the microsaccade increases the eye position error (D is longer than BE). doi:10.1371/journal.pone.0110889.g002

**Table 1.** Characteristics of non-human primate blinks.

| Non-human primate | #Blinks | % blinks increasing fixation error | Blink rate (blinks/sec) | Average magnitude of blink-induced error (deg) | Median post-blink microsaccade latency (msec) |
|-------------------|---------|------------------------------------|-------------------------|------------------------------------------------|-----------------------------------------------|
| Y                 | 22,686  | 75.71%                             | 0.28                    | 0.79                                           | 408                                           |
| H                 | 16,404  | 85.55%                             | 0.23                    | 0.83                                           | 345                                           |
| C                 | 9,797   | 72.92%                             | 0.28                    | 0.75                                           | 215                                           |
| J                 | 1,928   | 59.62%                             | 0.19                    | 1.28                                           | 202                                           |
| F                 | 43,700  | 58.74%                             | 0.39                    | 0.72                                           | 154                                           |

doi:10.1371/journal.pone.0110889.t001

reduce blink-induced fixation errors. We limited our analyses to those cases where the fixation error increased from pre-blink to post-blink. This occurred for the 70.50% of the non-human primate blinks.

The magnitudes of post-blink microsaccades were significantly correlated to those of blink-induced fixation errors ( $p < 10^{-13}$ ;  $r^2 = 0.075$ ) (Figure 3A). Moreover, the direction of post-blink microsaccades was counter to that of blink-induced fixation errors (Figure 3B), supporting a potential corrective role for post-blink microsaccades. Microsaccade production was highest (74.12% of all post-blink microsaccades) in the first ~400 msec after the blink, and asymptoted subsequently (Figure 3C). Accordingly, post-blink fixation errors were largest immediately after the blink, and decreased gradually for the first several hundred msec, stabilizing at ~400 msec after the end of the blink (Figure 3D).

We conducted equivalent analyses for human fixational eye movements recorded with a high-speed video-tracker (EyeLink 1000, SR Research; see Methods for further details), and also limited the analyses to those cases where the fixation error increased from pre-blink (0.41+/-0.19 deg on average) to post-blink (0.95+/-0.38 deg on average). This occurred for 61.23% of the blinks in the human data. The results were comparable to those found in non-human primates (Figure S1). Microsaccade production was highest (61.32% of all post-blink microsaccades) in the first ~200 msec after the blink (Figure S1A). Correspondingly, blink-induced fixation errors greatly decreased during this period, stabilizing at ~400 msec after the end of the blink (Figure S1B).

To further establish whether fixational eye movements might correct post-blink gaze position errors, we calculated the correction ratio for microsaccades and drifts (CR; i.e. how much microsaccades and drifts reduced (positive CR) or increased (negative CR) such errors; see Methods). 76.65% of all post-blink microsaccades and 47.82% of all post-blink drifts reduced blink-induced error (positive CR). To establish significance, we compared those values to a chance level determined by random permutations (see Methods), and found that microsaccades, but not

drifts, significantly corrected blink-induced errors in primates (Figure 4).

In humans, 82.39% of all post-blink microsaccades reduced blink-induced error. Also consistent with the primate results, human microsaccades corrected blink-induced errors significantly better than chance (Figure S2). We did not perform drift analyses on the human eye movement data (see Methods).

Large blink-induced errors (>0.2 deg) were more effectively corrected than smaller ones in the primate (Figure 4A). We note that the chance level for the CR is negative (rather than zero) for small blink-induced fixation errors. In the presence of very small errors, microsaccades will tend to be error-increasing rather than error-correcting, owing to being larger than the error. Figure 5 illustrates blink-induced error magnitude as a major determinant of microsaccade triggering: large or moderate fixation errors resulted in corrective microsaccades (Figure 5A), whereas smaller errors led to microsaccades of random directions (Figure 5B). In the latter case, microsaccades overshot the zero position typically, even if they traveled in the adequate direction to correct the error (Figure 5B).

If gaze position errors due to blinks trigger corrective microsaccades, then microsaccades occurring shortly after blinks should be more corrective than microsaccades produced later on. Correspondingly, the primate data show that the most corrective post-blink microsaccades had the shortest latencies (Figure 6A). Further, microsaccade latencies after blinks were inversely related to the magnitude of the blink-induced errors (Figure 6B). That is, microsaccades occurred earlier after large than after small fixation errors due to blinks, and those microsaccades produced shortly after blinks corrected gaze position errors better than microsaccades that occurred later in time.

Equivalent analyses of the human eye movement data showed comparable results (Figure S3).

Our combined results indicate that blinks contribute to the instability of gaze during fixation, and that microsaccades help to correct the fixation errors introduced by blinks.

**Table 2.** Average magnitude of fixation errors induced by different types of ocular events.

|                    | Blinks          | Microsaccades   | Drifts          |
|--------------------|-----------------|-----------------|-----------------|
| Non-human primates | 0.88+/-0.45 deg | 0.44+/-0.15 deg | 0.76+/-0.18 deg |
| Humans             | 0.95+/-0.38 deg | 0.68+/-0.16 deg | -               |

Fixation errors associated with blinks tended to be larger than those associated with (all) microsaccades or drifts, but not significantly so.

doi:10.1371/journal.pone.0110889.t002



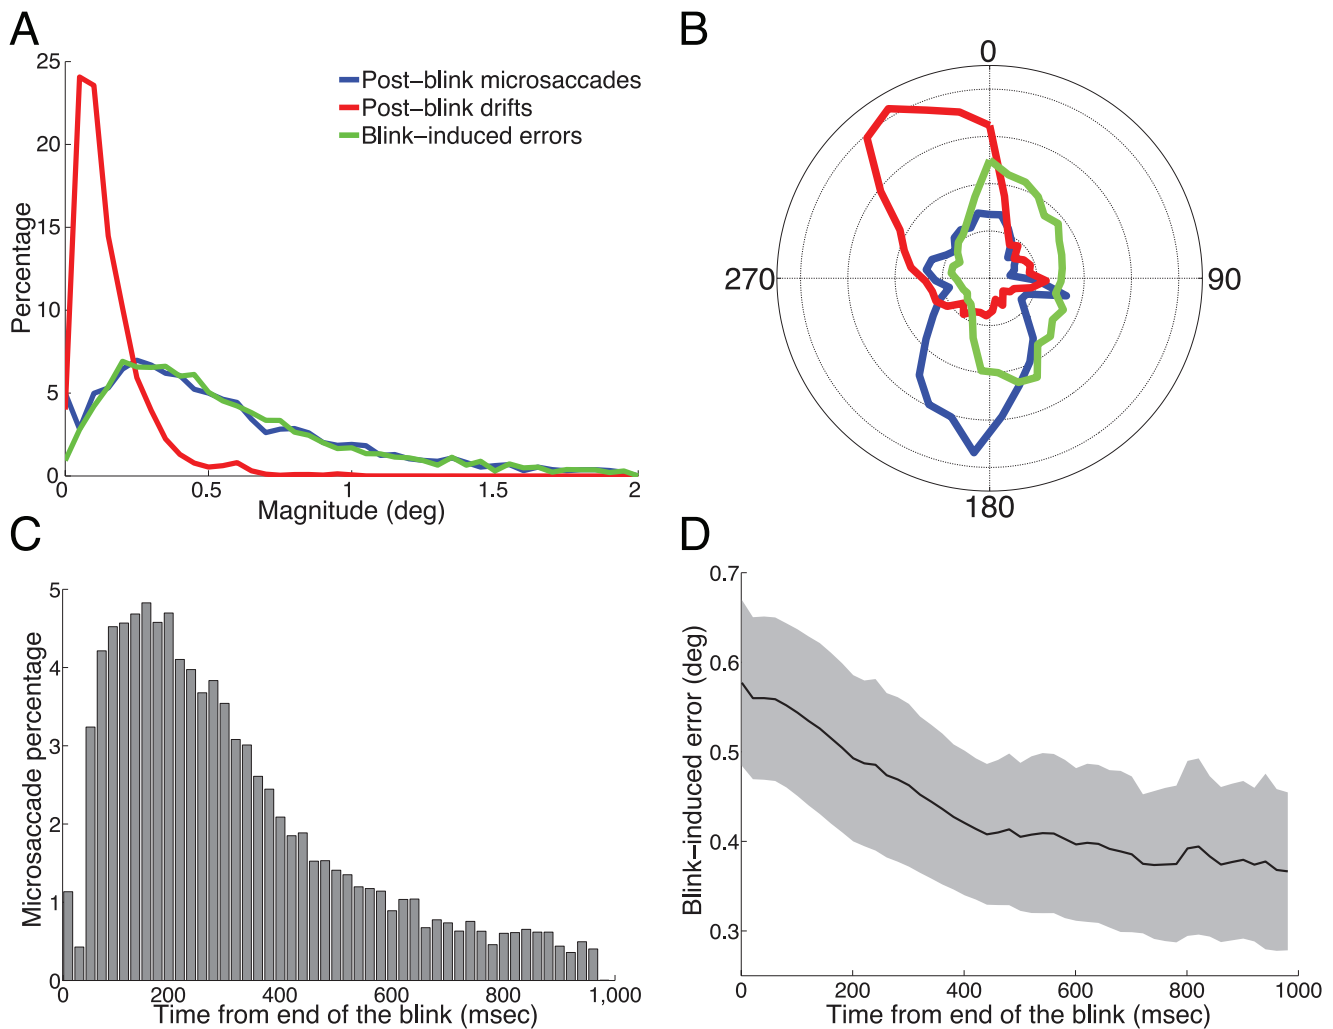

**Figure 3. Blink-induced error and microsaccade properties.** (A) Normalized magnitude distributions of blink-induced fixation errors, post-blink microsaccades, and post-blink drifts across non-human primates. The distribution of post-blink microsaccade magnitudes matches closely that of blink-induced fixation errors. (B) Polar histogram of the directions of blink-induced fixation errors, post-blink microsaccades, and post-blink drifts. Blink-induced fixation errors are more likely directed upward. Post-blink microsaccades tend to move the eye downward, thus counteracting the error introduced by the blink. (C) Latency distribution for post-blink microsaccades (all monkeys combined): 74.12% of post-blink microsaccade onsets occurred in the initial 400 msec after the end of the blink. (D) Blink-induced error as a function of time, from the end of the blink onward. We calculated the blink-induced error at every point in time, whether there were concurrent microsaccades or drifts. The blink-induced error declines gradually, showing the largest decrease in the initial 400 msec interval, simultaneous to the highest production of post-blink microsaccades. Shaded area indicates the SEM across monkeys ( $n = 5$  monkeys). doi:10.1371/journal.pone.0110889.g003

## Discussion

Many microsaccade functions have been proposed, such as keeping the fixated region centered on the optimal locus [5,6,14,28–31], counteracting and preventing perceptual fading [19,26,32–35], enhancing fine spatial detail/improving visual acuity [36,37], scanning small visual regions [38,39], and sampling the informative regions of a scene [40]. In addition, microsaccades have been linked to the perception of illusory motion in certain static repetitive patterns [41,42] (presumably in combination with cortical activation of motion-selective neurons, see [43–46]). These various roles need not be mutually exclusive but may overlap considerably.

Here we examined the characteristics of gaze position errors induced by spontaneous blinks in fixating primates and humans, and set out to assess how subsequent fixational eye movements, including microsaccades and drift, might correct them. To our

knowledge, no previous studies have determined the comparative contributions of post-blink microsaccades and drifts to the correction of blink-induced errors.

### 3.1 Blink-induced fixation errors

Blinking dynamics have been described in humans and in non-human species [47–51]. In the alert cat, spontaneous blinks consist of a fast, large downward lid movement followed by a slower up phase [51]. In humans, transient downward and nasalward movements of both eyes, with amplitudes ranging from one to several degrees, tend to accompany voluntary and reflex blinks [52,53]. Blink-induced gaze position errors and subsequent corrective saccades have been reported in humans [52,54] and primates [18]. (Interestingly, strong eye retraction in fish—an early precursor of the eyelid blinks of terrestrial animals—also elicits the return of both eyes to a central position in the orbit [55]). Our

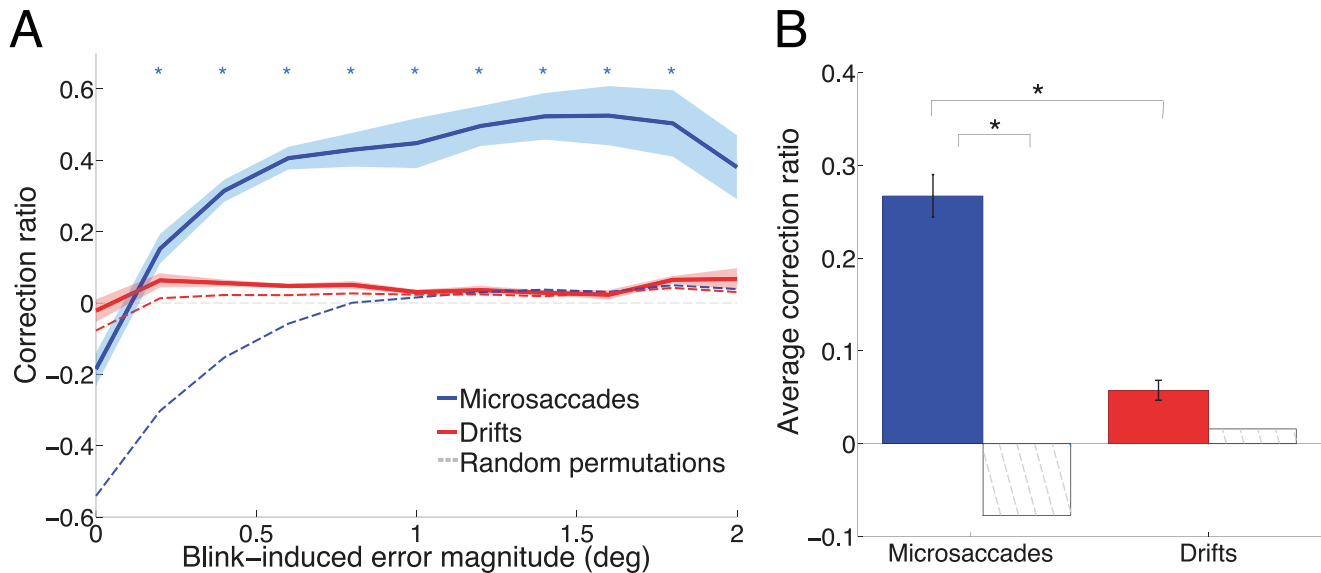

**Figure 4. Blink-induced error correction by fixational eye movements.** (A) Correction ratio for microsaccades and drifts (solid lines) versus random permutations (dotted lines) as a function of error magnitude. Asterisks indicate statistical significance (two-tailed paired *t*-test between microsaccade or drifts and permutations, Bonferroni corrected  $p < 0.01$ ). Microsaccades correct blink-induced fixation errors better than chance (i.e. random permutations; see *Methods* for details). Drifts are not significantly different than permutation. Microsaccades corrected large blink-induced errors ( $> 0.2$  degrees) better than small blink-induced errors. Error bars and shaded areas indicate the SEM across monkeys ( $n = 5$ ). (B) Average correction ratio for microsaccades and drifts (filled bars) compared to chance (striped bars). Asterisks indicate statistical significance (two-tailed paired *t*-test,  $p < 0.01$ ) ( $n = 5$  monkeys).

doi:10.1371/journal.pone.0110889.g004

present results extend this research by indicating that a) Eye motion during spontaneous blinks results in sizable gaze-position errors in fixating primates and humans, and b) The magnitude of these blink-induced fixation errors ( $0.88 \pm 0.45$  deg on average in primates and  $0.95 \pm 0.38$  deg on average in humans; **Figures 2A–B, 3D, Figure S2, Table 1**) is such that micro-

saccades work to reduce them, and to return the eye to the fixation position.

### 3.2 Corrective role of microsaccades and drift

Having determined that eye movements during blinks result in sizable gaze position errors (**Figures 2A–B, 3D, Table 1**), we set out to measure the comparative contributions of subsequent

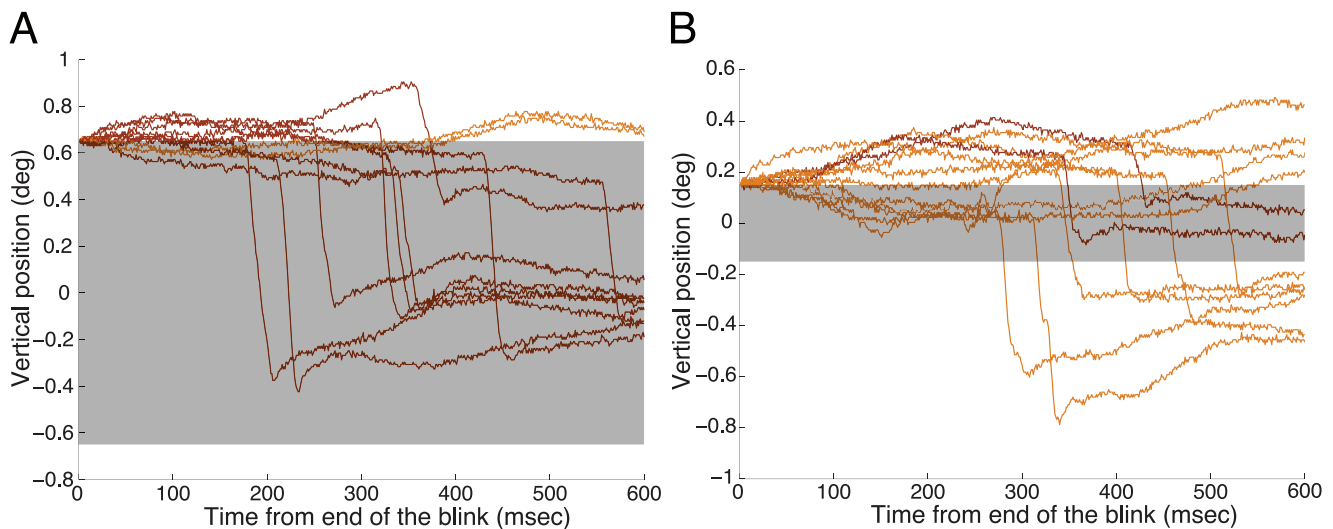

**Figure 5. Microsaccades decrease large and increase small blink-induced fixation errors.** (A) Vertical eye-position traces after 11 randomly-selected blinks that led to large vertical errors ( $[0.64–0.66$  deg], monkey Y). (B) Vertical eye-position traces after 11 randomly-selected blinks that led to small vertical errors ( $[0.14–0.16$  deg], monkey Y). (A, B) Grey band: range of final eye positions resulting in a positive CR. Brown traces: microsaccades decreased the blink-induced error. Orange traces: microsaccades increased the error. [We note that, although we considered all blinks in our analyses, blinks that took the eye below the fixation point were relatively infrequent ( $\sim 18\%$ ). Thus, this figure illustrates the more typical situation where blinks induced errors above the fixation point].

doi:10.1371/journal.pone.0110889.g005

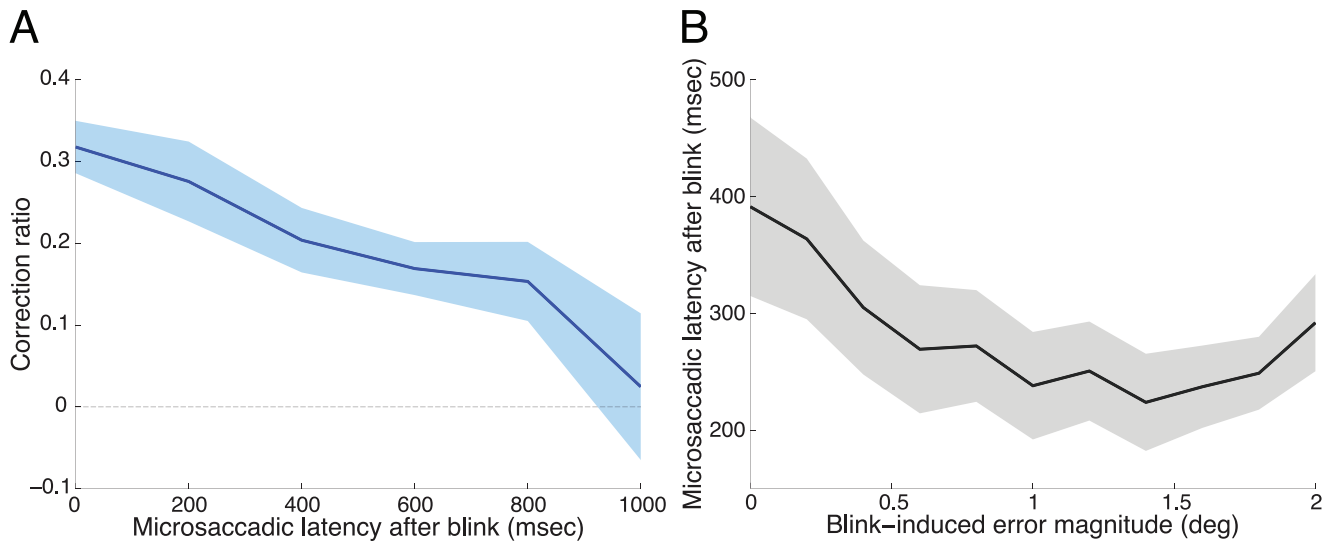

**Figure 6. Latency of microsaccades after blinks.** (A) Relationship between post-blink microsaccadic latency and correction ratio. Microsaccades occurring shortly after blinks were more corrective than microsaccades occurring later in time. (B) Relationship between blink-induced error magnitude and post-blink microsaccadic latency. Microsaccade latencies were shorter after large than small errors. Shaded areas indicate the SEM across monkeys ( $n = 5$ ). doi:10.1371/journal.pone.0110889.g006

microsaccades and drift to their correction. Our results show that primate microsaccades work to correct blink-induced gaze position errors during fixation, whereas drifts do not correct better than chance. Our results also indicate that primate and human microsaccades are similarly corrective.

Microsaccades corrected large blink-induced errors better than small blink-induced errors, consistent with the report that large fixation errors (due to error-inducing microsaccades) act to trigger subsequent corrective microsaccades of similar magnitude and opposite direction, resulting in square-wave jerks [8]. Our results are also compatible with the proposal that microsaccades are error-inducing on a short timescale and error-correcting on a longer timescale [6], and indicate that microsaccades play a more general role in error correction during fixation than thought previously.

In sum, our data indicate that 1) blinks contribute to the instability of gaze during fixation in the primate, 2) microsaccades but not drifts correct fixation errors introduced by blinks better than chance, 3) large fixation errors are better corrected than small errors, and 4) that non-human primate and human microsaccades are similarly corrective. These findings provide new insights about eye position control during fixation.

## Supporting Information

**Figure S1 Blink-induced error and microsaccade properties in human subjects.** (A) Latency distribution for post-blink microsaccades (all human subjects combined): 61.32% of post-blink microsaccade onsets occurred in the initial 200 msec after the end of the blink. (B) Blink-induced error as a function of time, from the end of the blink onward. We calculated the blink-induced error at every point in time, whether there were concurrent microsaccades or drifts. The blink-induced error declines gradually, showing the largest decrease in the initial 400 msec interval, simultaneous to the highest production of post-blink microsaccades. Shaded area indicates the SEM across human subjects ( $n = 11$ ). (EPS)

**Figure S2 Blink-induced error correction by microsaccades in human subjects.** (A) Correction ratio for microsaccades (solid lines) versus random permutations (dotted lines) as a function of error magnitude. Asterisks indicate statistical significance (two-tailed paired  $t$ -test between microsaccade and permutations, Bonferroni corrected  $p < 0.01$ ). Microsaccades correct blink-induced fixation errors better than chance (i.e. random permutations; see *Methods* for details). Microsaccades corrected large blink-induced errors ( $> 0.2$  degrees) better than small blink-induced errors (see **Figure 4**). (A, B) Error bars and shaded areas indicate the SEM across humans ( $n = 11$ ). (B) Average correction ratio for microsaccades (filled bars) compared to chance (striped bars). Asterisks indicate statistical significance (two-tailed paired  $t$ -test,  $p < 0.01$ ) ( $n = 11$  subjects). (EPS)

**Figure S3 Latency of microsaccades after blinks in human subjects.** (A) Relationship between post-blink microsaccadic latency and correction ratio. Microsaccades occurring shortly after blinks were more corrective than microsaccades occurring later in time. (B) Relationship between blink-induced error magnitude and post-blink microsaccadic latency. Microsaccade latencies were shorter after large than small errors. Shaded areas indicate the SEM across humans ( $n = 11$  subjects). (EPS)

## Acknowledgments

We thank Dr. David Hubel for contributing his expertise during the recordings conducted in his laboratory at Harvard Medical School. Jorge Otero-Millan was a Fellow of the Pedro Barrié de la Maza Foundation. We thank Dr. Leandro Luigi Di Stasi for his comments, and Isabel Gomez-Caraballo, Manuel Ledo, Andrew Danielson, Behrooz Kousari, Mona Stewart, Nishit Srivastava, Peter Wetenstein, Michael LaFratta, Gail Robertson, and Frederic Russo for technical and administrative assistance.

## Author Contributions

Conceived and designed the experiments: FMC JO MBM SLM SM. Performed the experiments: FMC ANJ XGT. Analyzed the data: FMC JO

MBM. Contributed reagents/materials/analysis tools: FMC JO MBM. Contributed to the writing of the manuscript: FMC MBM SMC SM.

## References

- Martinez-Conde S, Macknik SL, Hubel DH (2004) The role of fixational eye movements in visual perception. *Nat Rev Neurosci* 5: 229–240.
- Martinez-Conde S, Macknik SL, Troncoso XG, Hubel DH (2009) Microsaccades: a neurophysiological analysis. *Trends Neurosci* 32: 463–475. doi:10.1016/j.tins.2009.05.006.
- Martinez-Conde S, Otero-Millan J, Macknik SL (2013) The impact of microsaccades on vision: towards a unified theory of saccadic function. *Nature Reviews Neuroscience* 14: 83–96. doi:10.1038/nrn3405.
- Rolf's M (2009) Microsaccades: Small steps on a long way. *Vision Res* 49: 2415–2441. doi:10.1016/j.visres.2009.08.010.
- Cornsweet TN (1956) Determination of the stimuli for involuntary drifts and saccadic eye movements. *J Opt Soc Am* 46: 987–988. doi:10.1364/JOSA.46.000987.
- Engbert R, Kliegl R (2004) Microsaccades keep the eyes' balance during fixation. *Psychol Sci* 15: 431–436. doi:10.1111/j.0956-7976.2004.00697.x.
- Otero-Millan J, Macknik SL, Serra A, Leigh RJ, Martinez-Conde S (2011) Triggering mechanisms in microsaccade and saccade generation: a novel proposal. *Ann N Y Acad Sci* 1233: 107–116. doi:10.1111/j.1749-6632.2011.06177.x.
- Otero-Millan J, Serra A, Leigh RJ, Troncoso XG, Macknik SL, et al. (2011) Distinctive features of saccadic intrusions and microsaccades in progressive supranuclear palsy. *J Neurosci* 31: 4379–4387. doi:10.1523/JNEUROSCI.2600-10.2011.
- Otero-Millan J, Schneider R, Leigh RJ, Macknik SL, Martinez-Conde S (2013) Saccades during Attempted Fixation in Parkinsonian Disorders and Recessive Ataxia: From Microsaccades to Square-Wave Jerks. *PLoS ONE* 8: e58535. doi:10.1371/journal.pone.0058535.
- Collewijn H, Kowler E (2008) The significance of microsaccades for vision and oculomotor control. *Journal of Vision* 8.
- Robinson DA (1963) A method of measuring eye movements using a scleral coil in a magnetic field. *IEEE Trans Biomed Eng* 10: 137–145.
- Martinez-Conde S, Macknik SL, Hubel DH (2000) Microsaccadic eye movements and firing of single cells in the striate cortex of macaque monkeys. *Nat Neurosci* 3: 251–258.
- Martinez-Conde S, Macknik SL, Hubel DH (2002) The function of bursts of spikes during visual fixation in the awake primate lateral geniculate nucleus and primary visual cortex. *Proceedings of the National Academy of Sciences* 99: 13920–13925.
- McCamy MB, Najafian Jazi A, Otero-Millan J, Macknik SL, Martinez-Conde S (2013) The effects of fixation target size and luminance on microsaccades and square-wave jerks. *PeerJ* 1: e9. doi:10.7717/peerj.9.
- Brainard DH (1997) The psychophysics toolbox. *Spatial vision* 10: 433–436.
- Kleiner M, Brainard D, Pelli D, Ingling A, Murray R, et al. (2007) What's new in Psychtoolbox-3. *Perception* 36.
- Pelli DG (1997) The VideoToolbox software for visual psychophysics: Transforming numbers into movies. *Spatial vision* 10: 437–442.
- Goossens H, Van Opstal AJ (2000) Blink-perturbed saccades in monkey. I. Behavioral analysis. *Journal of Neurophysiology* 83: 3411.
- Troncoso XG, Macknik SL, Martinez-Conde S (2008) Microsaccades counteract perceptual filling-in. *J Vis* 8: 1–9. doi:10.1167/8.14.15.
- Engbert R, Kliegl R (2003) Microsaccades uncover the orientation of covert attention. *Vision Res* 43: 1035–1045. doi:10.1016/S0042-6989(03)00084-1.
- Laubrock J, Engbert R, Kliegl R (2005) Microsaccade dynamics during covert attention. *Vision Res* 45: 721–730. doi:10.1016/j.visres.2004.09.029.
- Engbert R (2006) Microsaccades: A microcosm for research on oculomotor control, attention, and visual perception. *Prog Brain Res* 154: 177–192.
- Engbert R, Mergenthaler K (2006) Microsaccades are triggered by low retinal image slip. *Proc Natl Acad Sci USA* 103: 7192–7197. doi:10.1073/pnas.0509557103.
- Rolf's M, Laubrock J, Kliegl R (2006) Shortening and prolongation of saccade latencies following microsaccades. *Exp Brain Res* 169: 369–376. doi:10.1007/s00221-005-0148-1.
- Betta E, Turatto M (2006) Are you ready? I can tell by looking at your microsaccades. *Neuroreport* 17: 1001.
- McCamy MB, Collins N, Otero-Millan J, Al-Kalbani M, Macknik SL, et al. (2013) Simultaneous recordings of ocular microtremor and microsaccades with a piezoelectric sensor and a video-oculography system. *PeerJ* 1: e14. doi:10.7717/peerj.14.
- Siegenthaler E, Costela FM, McCamy MB, Di Stasi LL, Otero-Millan J, et al. (2014) Task difficulty in mental arithmetic affects microsaccadic rates and magnitudes. *European Journal of Neuroscience* 39: 287–294. doi:10.1111/cjn.12395.
- Nachmias J (1961) Determinants of the drift of the eye during monocular fixation. *Journal of the Optical Society of America* (1917–1983) 51: 761.
- Boyce PR (1967) Monocular Fixation in Human Eye Movement. *Proceedings of the Royal Society of London Series B Biological Sciences* 167: 293–315. doi:10.1098/rspb.1967.0028.
- St.Cyr GJ, Fender DH (1969) The interplay of drifts and flicks in binocular fixation. *Vision Research* 9: 245–265. doi:10.1016/0042-6989(69)90004-2.
- Putnam NM, Hofer HJ, Doble N, Chen L, Carroll J, et al. (2005) The locus of fixation and the foveal cone mosaic. *Journal of Vision* 5.
- Martinez-Conde S, Macknik SL, Troncoso XG, Dyar TA (2006) Microsaccades counteract visual fading during fixation. *Neuron* 49: 297–305. doi:10.1016/j.neuron.2005.11.033.
- McCamy MB, Otero-Millan J, Macknik SL, Yang Y, Troncoso XG, et al. (2012) Microsaccadic Efficacy and Contribution to Foveal and Peripheral Vision. *J Neurosci* 32: 9194–9204. doi:10.1523/JNEUROSCI.0515-12.2012.
- Costela FM, McCamy MB, Macknik SL, Otero-Millan J, Martinez-Conde S (2013) Microsaccades restore the visibility of minute foveal targets. *PeerJ* 1: e119. doi:10.7717/peerj.119.
- McCamy MB, Macknik SL, Martinez-Conde S (2014) Different fixational eye movements mediate the prevention and the reversal of visual fading. *The Journal of physiology*.
- Donner K, Hemilä S (2007) Modelling the effect of microsaccades on retinal responses to stationary contrast patterns. *Vision Research* 47: 1166–1177. doi:10.1016/j.visres.2006.11.024.
- Rucci M, Iovin R, Poletti M, Santini F (2007) Miniature eye movements enhance fine spatial detail. *Nature* 447: 852–855. doi:10.1038/nature05866.
- Haddad GM, Steinman RM (1973) The smallest voluntary saccade: implications for fixation. *Vision Res* 13: 1075–1086.
- Otero-Millan J, Macknik SL, Langston RE, Martinez-Conde S (2013) An oculomotor continuum from exploration to fixation. *PNAS* 110: 6175–6180. doi:10.1073/pnas.1222715110.
- McCamy MB, Otero-Millan J, Di Stasi LL, Macknik SL, Martinez-Conde S (2014) Highly informative natural scene regions increase microsaccade production during visual scanning. *J Neurosci* 34: 2956–2966. doi:10.1523/JNEUROSCI.4448-13.2014.
- Troncoso XG, Macknik SL, Otero-Millan J, Martinez-Conde S (2008) Microsaccades drive illusory motion in the Enigma illusion. *Proc Natl Acad Sci USA* 105: 16033–16038. doi:10.1073/pnas.0709389105.
- Otero-Millan J, Macknik SL, Martinez-Conde S (2012) Microsaccades and Blinks Trigger Illusory Rotation in the “Rotating Snakes” Illusion. *J Neurosci* 32: 6043–6051. doi:10.1523/JNEUROSCI.5823-11.2012.
- Gori S, Hamburger K, Spillmann L (2006) Reversal of apparent rotation in the Enigma-figure with and without motion adaptation and the effect of T-junctions. *Vision research* 46: 3267–3273.
- Ruzzoli M, Gori S, Pavan A, Pirulli C, Marzi CA, et al. (2011) The neural basis of the Enigma illusion: a transcranial magnetic stimulation study. *Neuropsychologia* 49: 3648–3655. doi:10.1016/j.neuropsychologia.2011.09.020.
- Kuriki I, Ashida H, Murakami I, Kitaoka A (2008) Functional brain imaging of the “Rotating Snakes” illusion. *Journal of Vision* 8: 64. doi:10.1167/8.6.64.
- Ashida H, Kuriki I, Murakami I, Kitaoka A (2010) fMRI adaptation to anomalous motion in the “Rotating Snakes” patterns. *Journal of Vision* 10: 827.
- Ginsborg BL (1952) Rotation of the Eyes during Involuntary Blinking. *169: 412–413*. doi:10.1038/169412b0.
- Ginsborg BL, Maurice DM (1959) Involuntary movements of the eye during fixation and blinking. *British Medical Journal* 43: 435.
- Evinger C, Shaw MD, Peck CK, Manning KA, Baker R (1984) Blinking and associated eye movements in humans, guinea pigs, and rabbits. *J Neurophysiol* 52: 323–339.
- Porter JD, Stava MW, Gaddie IB, Baker RS (1993) Quantitative analysis of eyelid movement metrics reveals the highly stereotyped nature of monkey blinks. *Brain research* 609: 159–166.
- Gruart A, Blázquez P, Delgado-García JM (1995) Kinematics of spontaneous, reflex, and conditioned eyelid movements in the alert cat. *Journal of Neurophysiology* 74: 226–248.
- Collewijn H, Van Der Steen J, Steinman RM (1985) Human eye movements associated with blinks and prolonged eyelid closure. *Journal of Neurophysiology* 54: 11.
- Riggs LA, Kelly JP, Manning KA, Moore RK (1987) Blink-related eye movements. *Investigative ophthalmology & visual science* 28: 334.
- Takagi M, Abe H, Hasegawa S, Usui T (1992) Reconsideration of Bell's phenomenon using a magnetic search coil method. *Doc Ophthalmol* 80: 343–352. doi:10.1007/BF00154383.
- Pastor AM, Torres B, Delgado-García JM, Baker R (1991) Discharge characteristics of medial rectus and abducens motoneurons in the goldfish. *J Neurophysiol* 66: 2125–2140.
